# Supplementary material for: Characterizing the behaviour of surge- and non-surge-type glaciers in the Kingata Mountains, eastern Pamir, from 1999 to 2016
Source: Copernicus journal article supplement (doi:10.5194/tc-13-219-2019), 2019-01-24
Supplement: Supplementary file 2 [file tc-13-219-2019-supplement.zip]

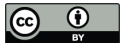

## *Supplement of*

# **Characterizing the behaviour of surge- and non-surge-type glaciers in the Kingata Mountains, eastern Pamir, from 1999 to 2016**

Mingyang Lv et al.

*Correspondence to:* Guang Liu (liug@ceode.ac.cn)

- tc-13-219-2019-supplement-title-page.pdf
- Figure S2
  - AdvanceW10\_2007\_2011.gif
  - AdvanceW10\_2007\_2011zoom.gif
  - AdvanceW11\_2007\_2011.gif
  - AdvanceW2\_2012\_2015.gif
  - SureE11\_2007\_2012.gif
  - SurgE1\_2012\_2015.gif
  - SurgeE10\_2007\_2011.gif
  - SurgeE12\_2007\_2011.gif
  - SurgeE13\_2007\_2011.gif
  - SurgeE9\_2007\_2013.gif
  - SurgeW12\_2007\_2011.gif
  - SurgeW13\_2007\_2011.gif
  - SurgeW5\_2009\_2012.gif
  - SurgeW6\_2007\_2013.gif
  - SurgeW8\_2007\_2012.gif
  - SurgeW9\_2007\_2011.gif
- Supplement.pdf

The copyright of individual parts of the supplement might differ from the CC BY 4.0 License.
